# Supplementary material
Source: PubMed Central journal article supplement (PMC9420810)
Supplement: NIHMS1827376-supplement-1827376_Image_SD_ED_Fig_3.pdf [file NIHMS1827376-supplement-1827376_Image_SD_ED_Fig_3.pdf]

Source Data

Image of gel of picture from Extended Fig. 3e.

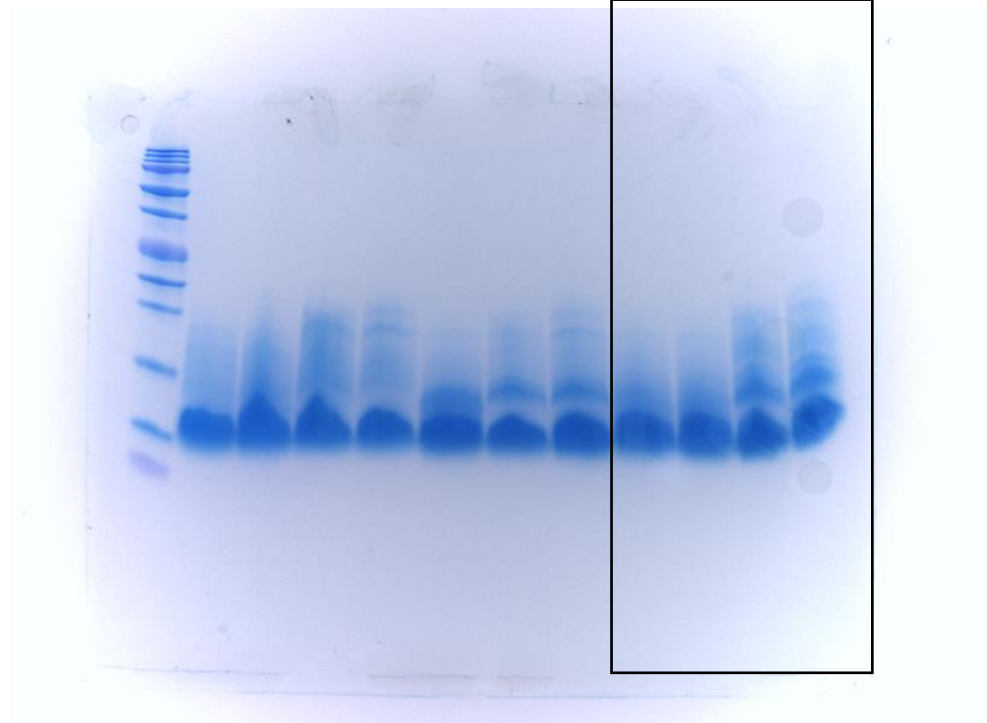

Entire boxed region is shown in extended fig 3E with no modifications.
