# Supplementary material
Source: PubMed Central journal article supplement (PMC9420810)

Image source data Extended data Fig. 6

Extended data Fig. 6 a1

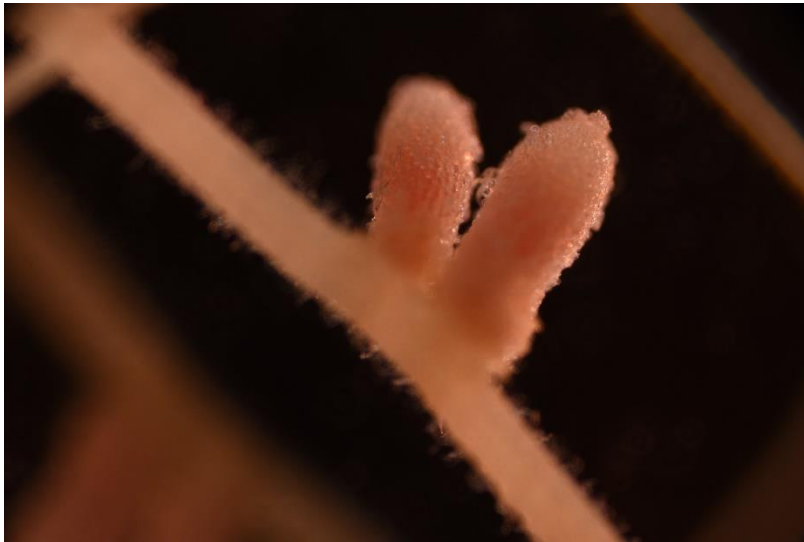

Extended data Fig. 6 a2

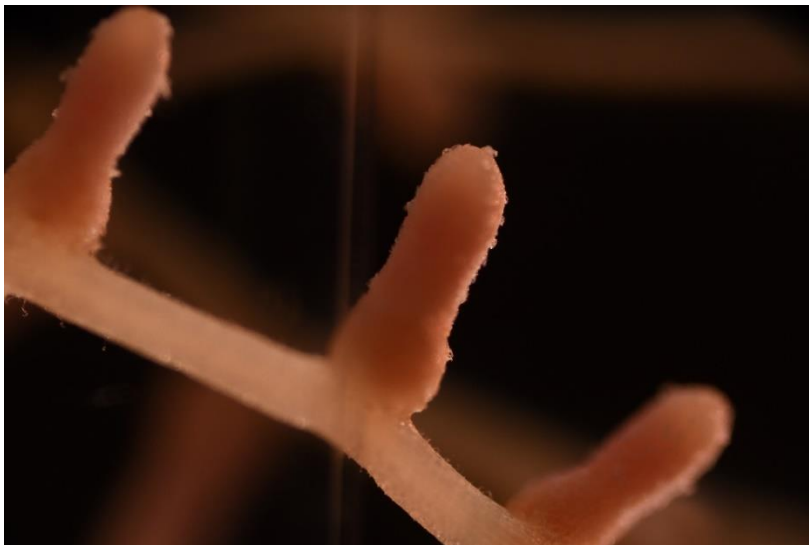

Extended data Fig. 6 b1

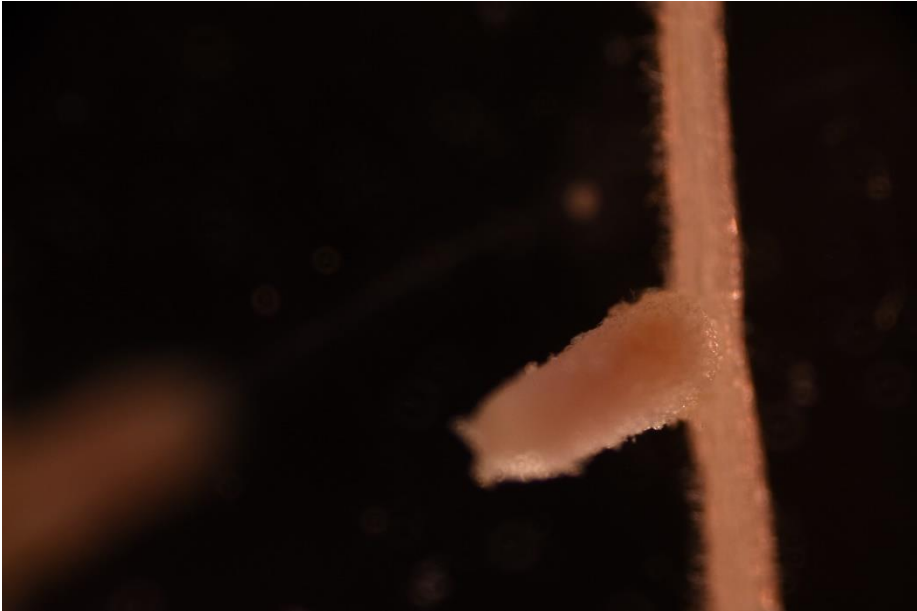

Extended data Fig. 6 b2

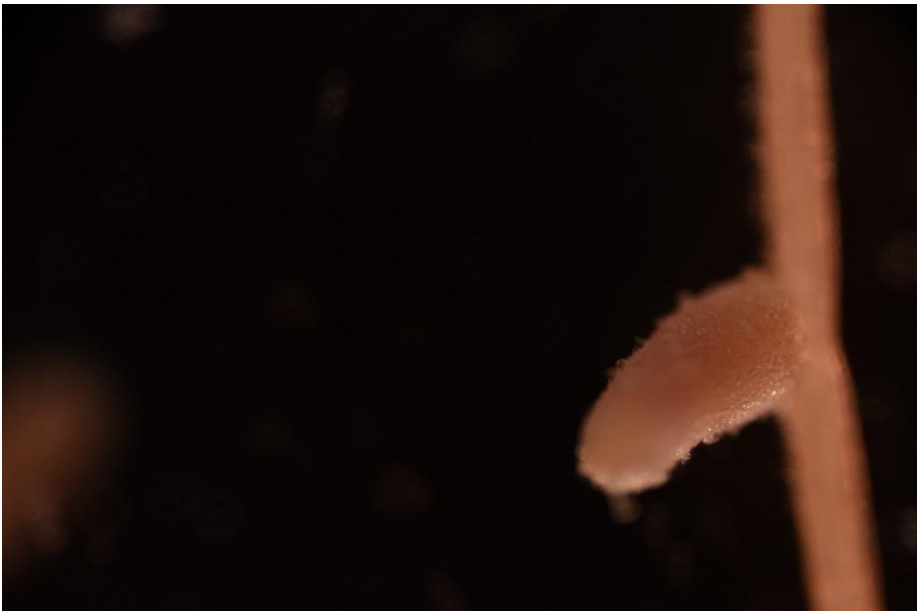

Extended data Fig. 6 c1

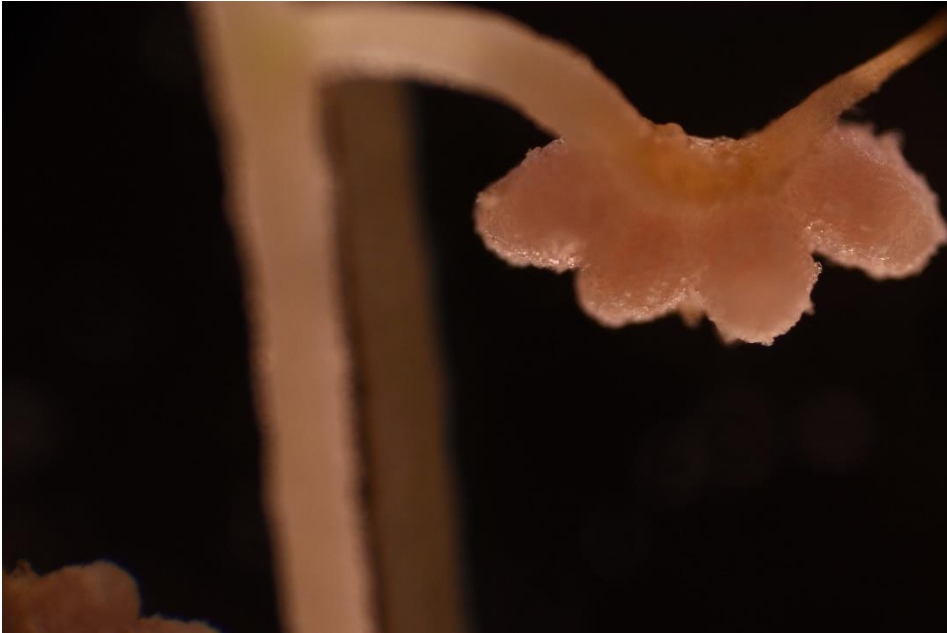

Extended data Fig. 6 c2

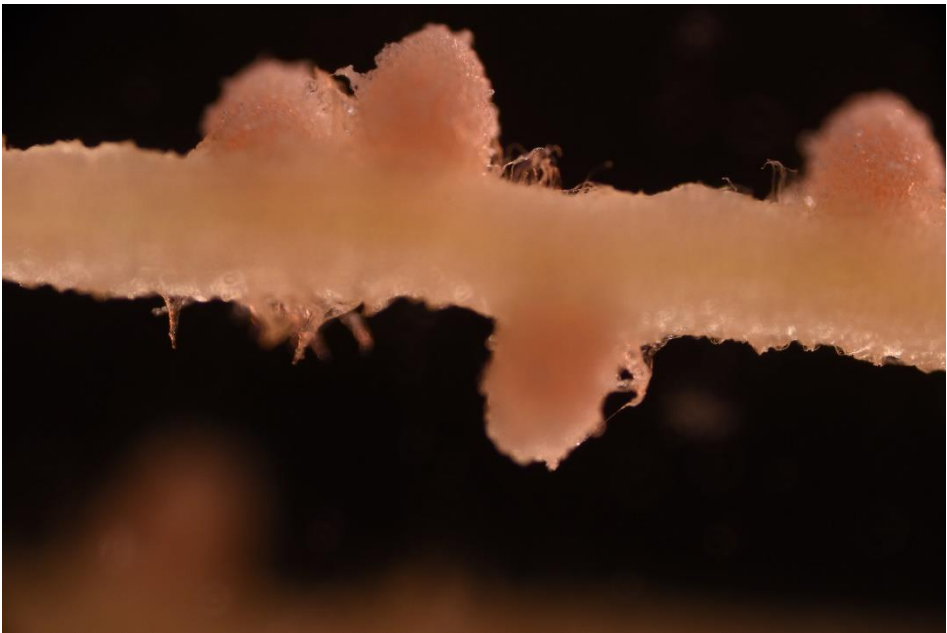

Extended data Fig. 6 d1

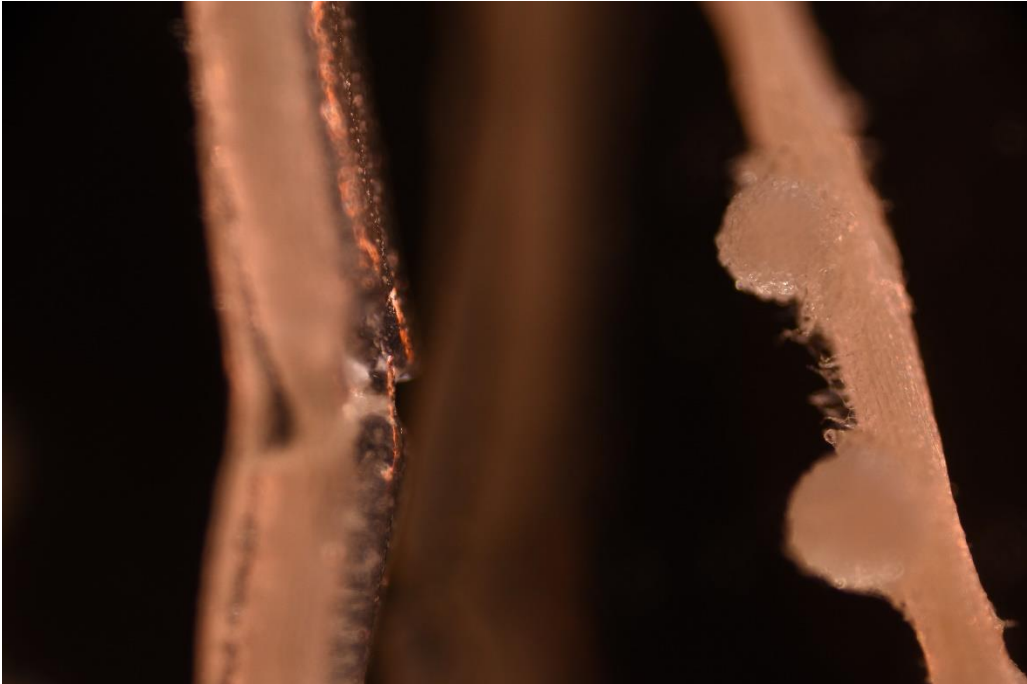

Extended data Fig. 6 d2

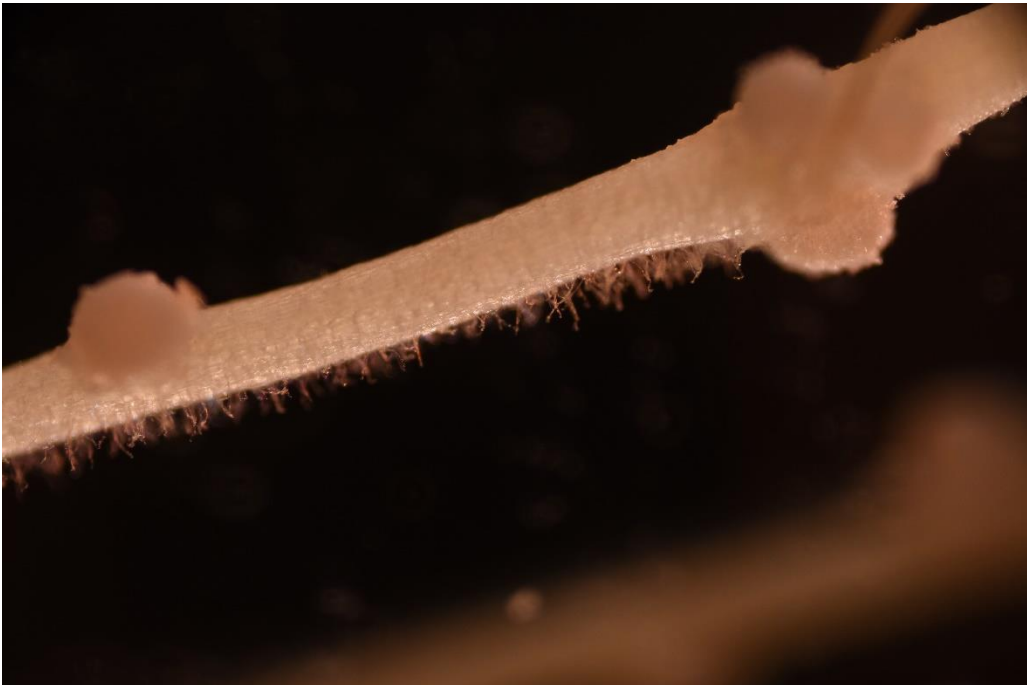

Supplement: NIHMS1827376-supplement-1827376_Image_SD_ED_Fig_6.pdf [file NIHMS1827376-supplement-1827376_Image_SD_ED_Fig_6.pdf]
