# Supplementary material
Source: PubMed Central journal article supplement (PMC9420810)
Supplement: NIHMS1827376-supplement-1827376_Sup_Fig_1.pdf [file NIHMS1827376-supplement-1827376_Sup_Fig_1.pdf]

## **Supplementary Tables**

**Supplementary Table 1:** Genes modified in expression upon NCR247 treatment that are annotated to be involved in iron: from Penterman et.al, PNAS, 2014.

**Supplementary Table 2:** Primers, plasmids and strains used in this study.

Supplementary Fig. 1

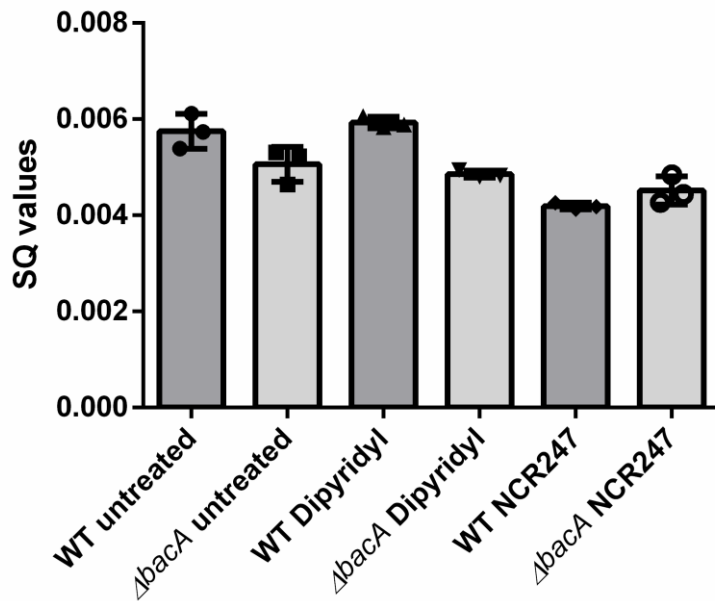

**Supplementary Fig. 1 | qRT-PCR analysis of the gene *SMc00128* used as a control in all the qPCR analysis.** The SQ values do not change due to iron limitation, NCR247 treatment, and  $\Delta bacA$  mutation. Direct SQ values are shown. Data are presented as a mean of three independent replicates  $\pm$  s.d. The change between genes is not significant according to student t test.
