# Supplementary material
Source: PubMed Central journal article supplement (PMC9420810)

Image source data Extended Fig. 2a

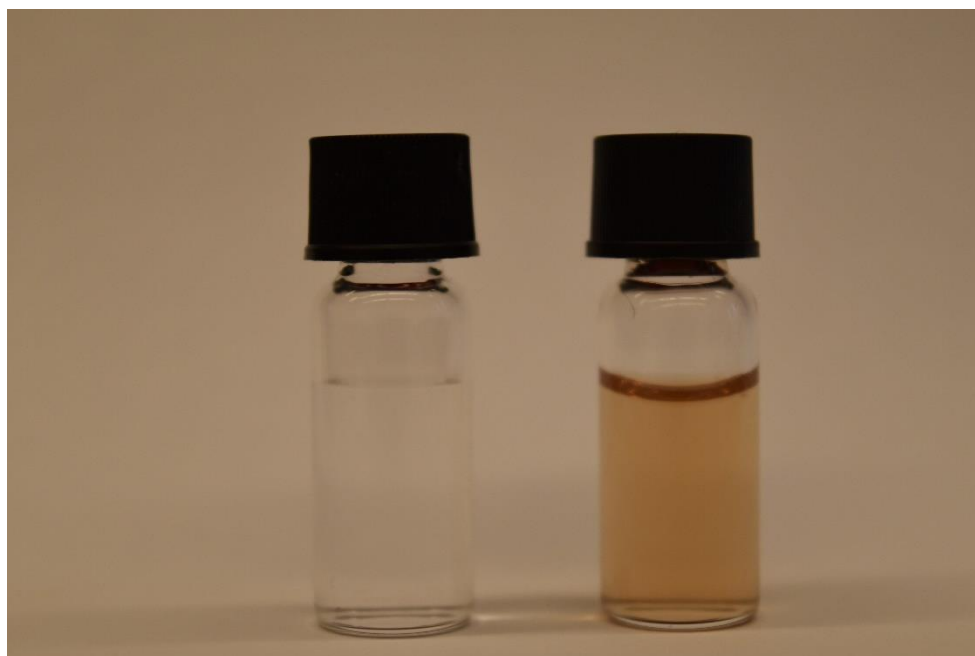

Supplement: NIHMS1827376-supplement-1827376_Image_SD_ED_Fig_2.pdf [file NIHMS1827376-supplement-1827376_Image_SD_ED_Fig_2.pdf]

Image source data Extended Fig.7

Extended Fig. 7e

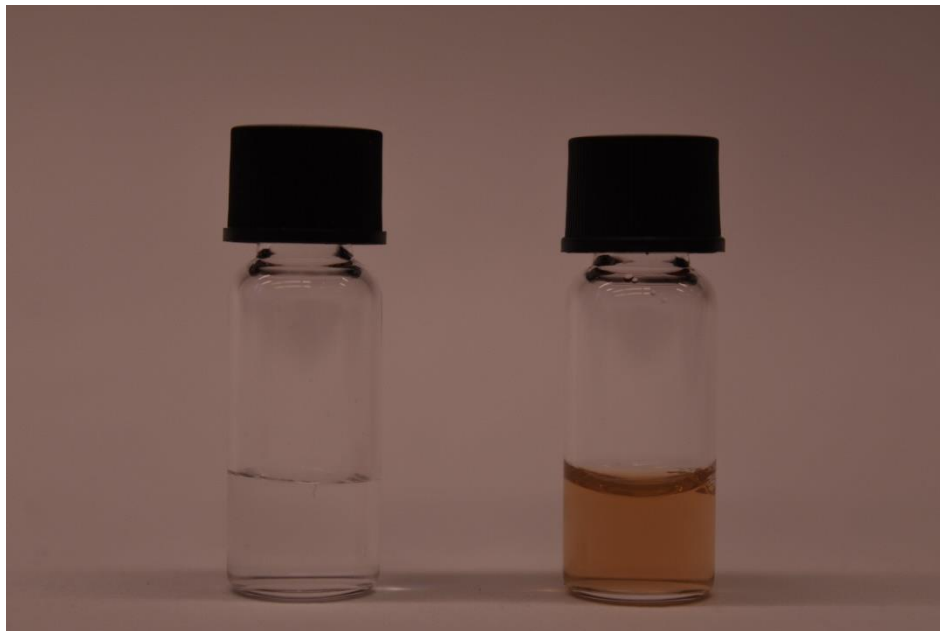

Extended Fig. 7g

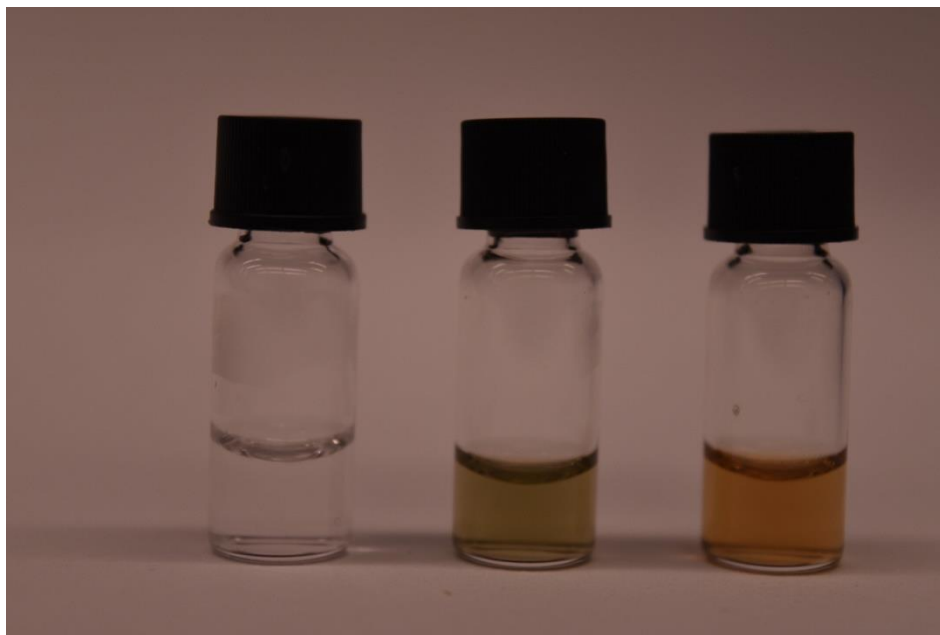

Supplement: NIHMS1827376-supplement-1827376_Image_SD_ED_Fig_7.pdf [file NIHMS1827376-supplement-1827376_Image_SD_ED_Fig_7.pdf]

Image Source data Fig. 2a

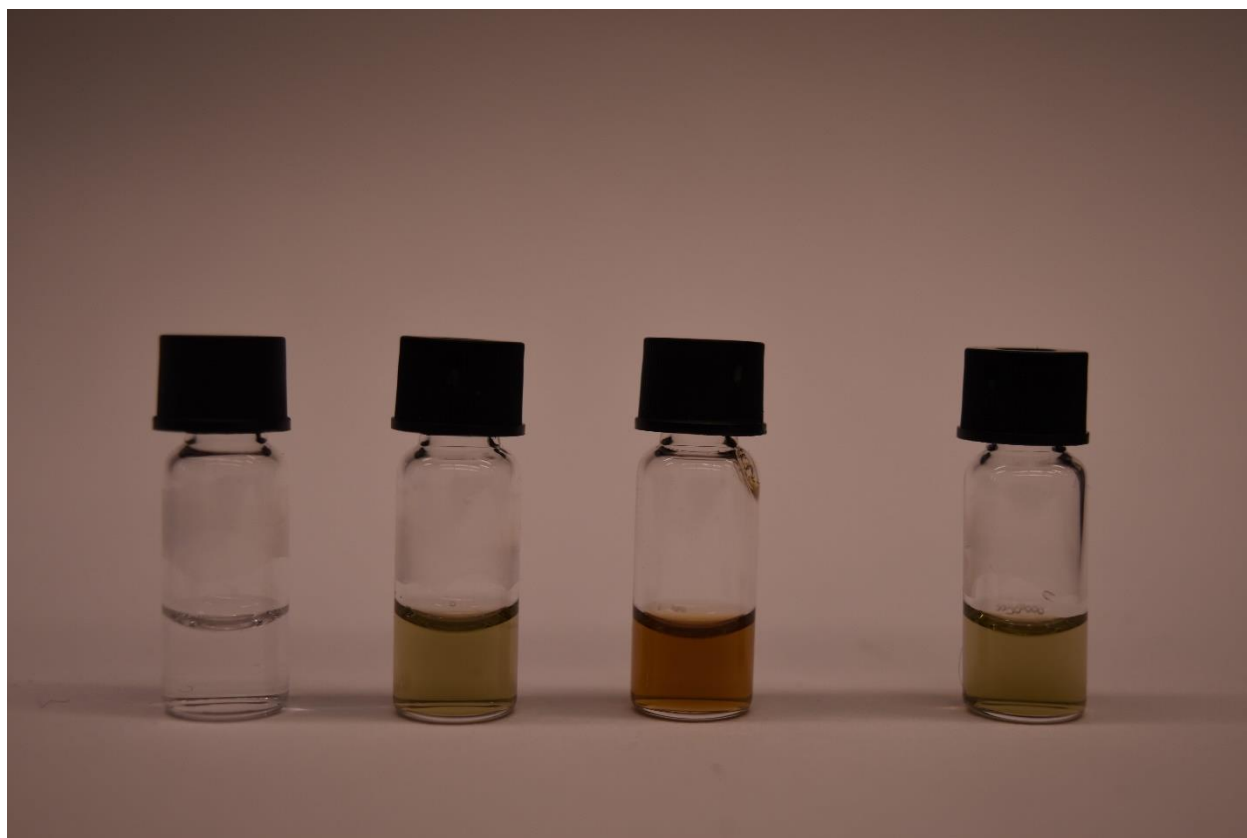

Supplement: NIHMS1827376-supplement-1827376_Image_SD_Fig_2.pdf [file NIHMS1827376-supplement-1827376_Image_SD_Fig_2.pdf]

Image source data Fig. 3

Fig 3h1

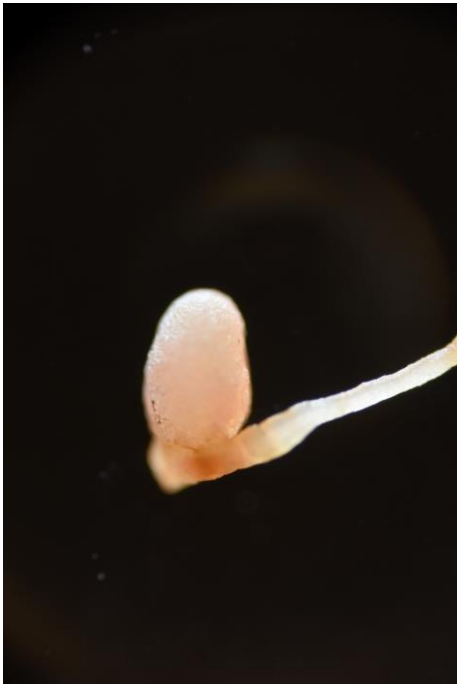

Fig 3 h2

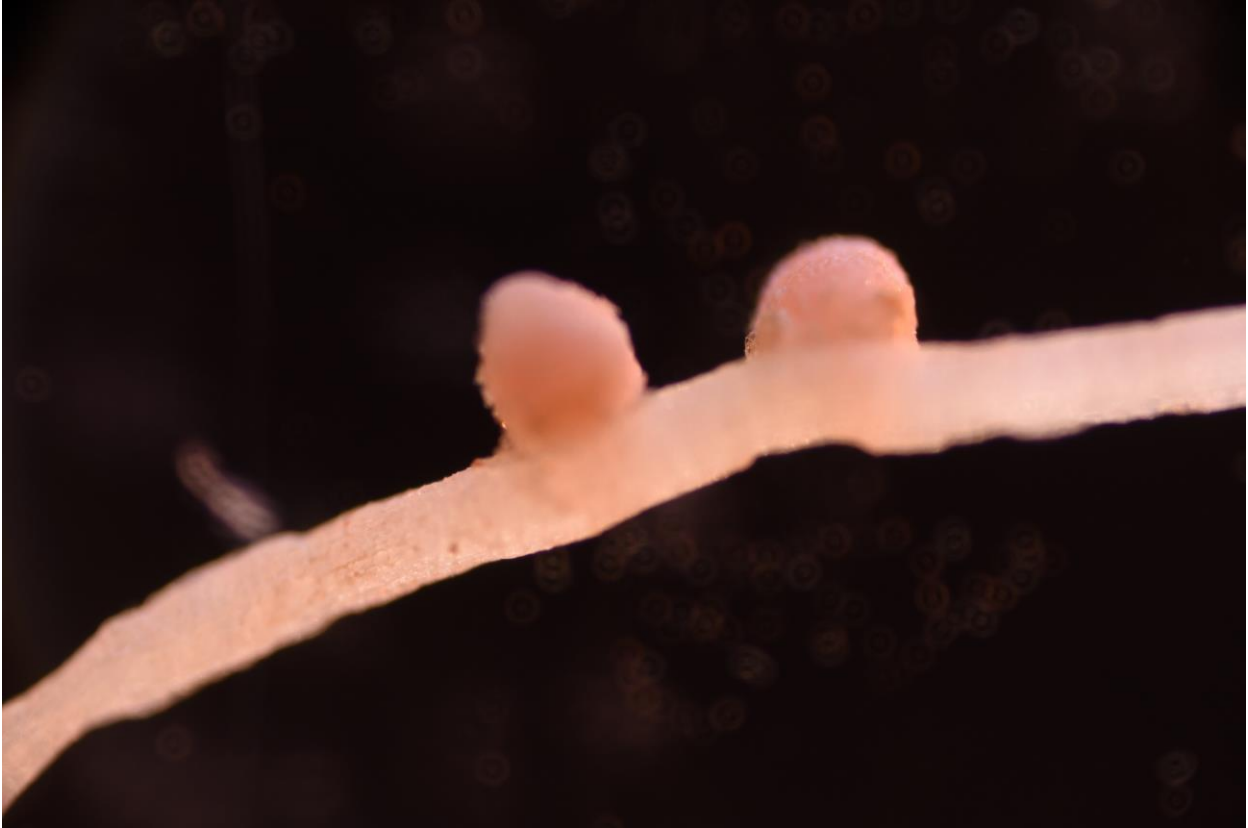

Fig 3 i1

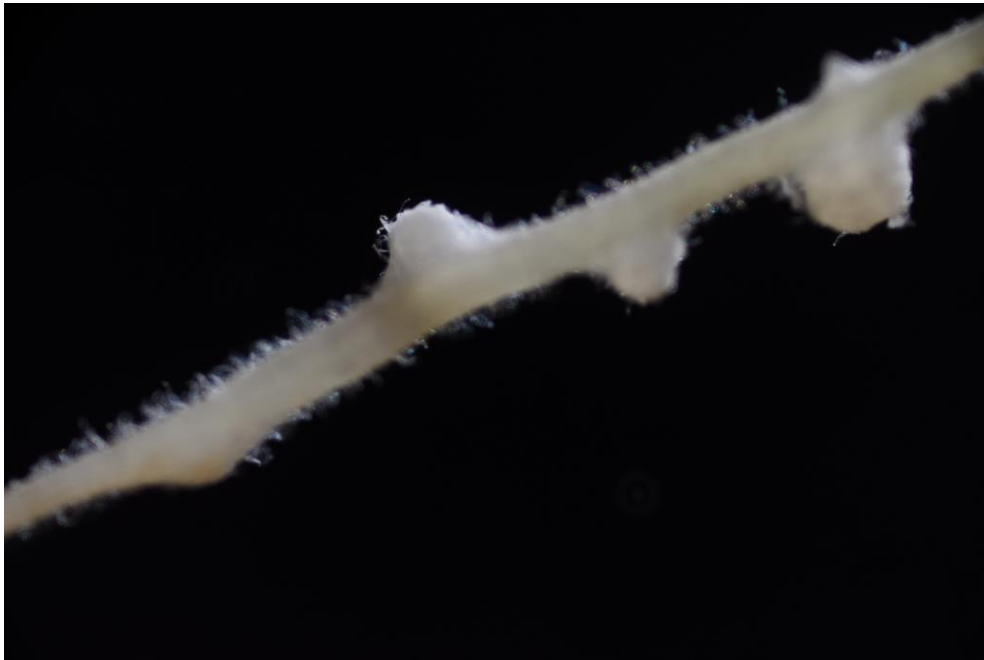

Fig 3 i2

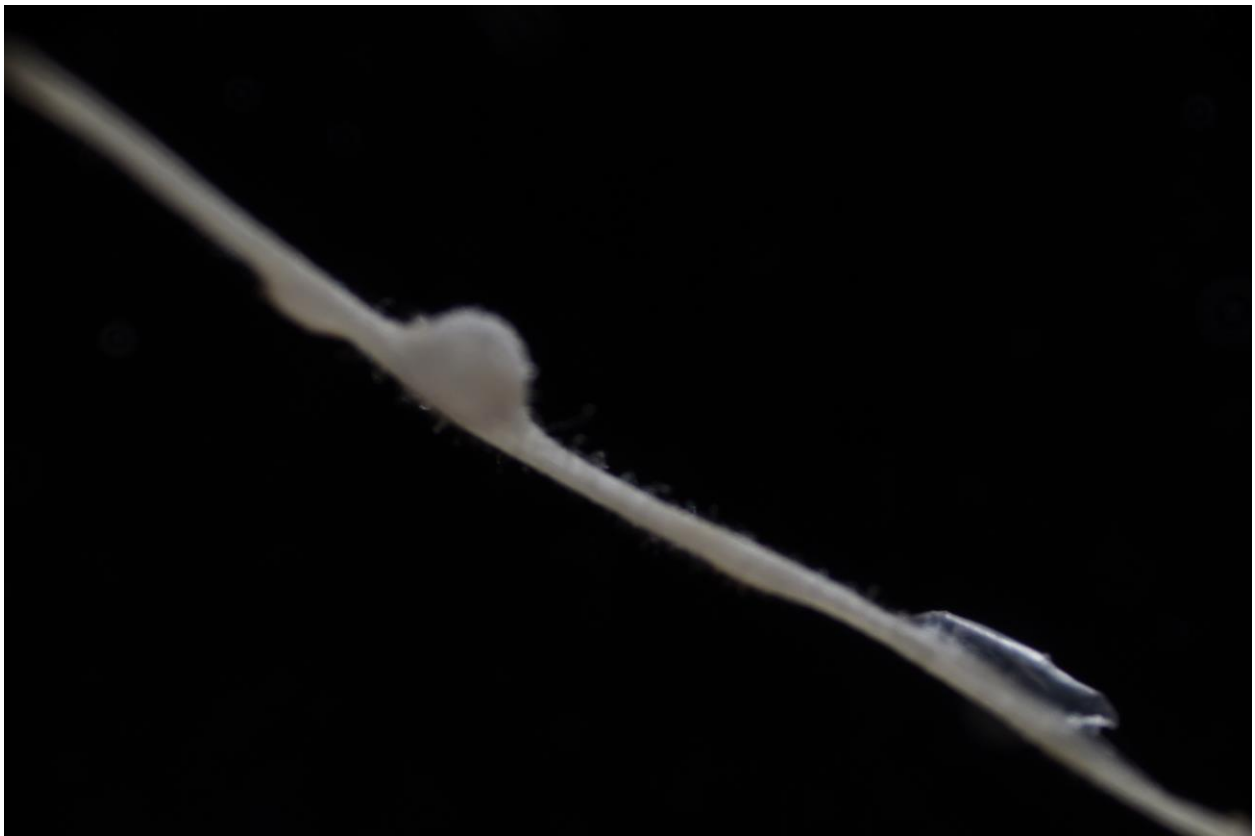

Supplement: NIHMS1827376-supplement-1827376_SD_ED_Fig_2_unprocessed_blot.pdf [file NIHMS1827376-supplement-1827376_SD_ED_Fig_2_unprocessed_blot.pdf]
